# Supplementary material for: Metformin Protects Rat Skeletal Muscle from Physical Exercise-Induced Injury
Source: MDPI journal article supplement (doi:10.3390/biomedicines11092334), 2023-08-22

Identity of the experimental samples: total muscle lysates  
Image captured by using ChemiDoc™ Touch Image System (Bio-Rad)  
Figure generated from this original image: Fig 7a/b (AMPK) - replicate 1

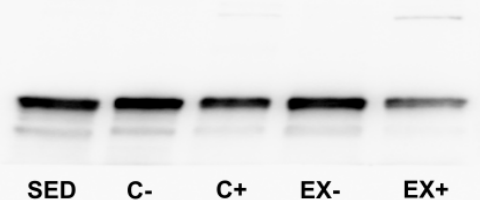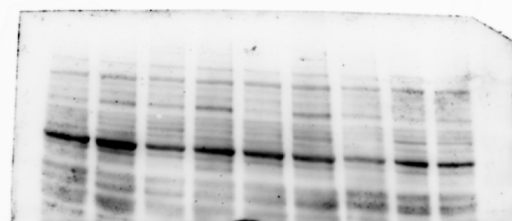

Identity of the experimental samples: total muscle lysates  
Image captured by using ChemiDoc™ Touch Image System (Bio-Rad)  
Figure generated from this original image: Fig 7a/b (AMPK) - replicate 2

X X SED C- C+ EX- EX+ X X

Identity of the experimental samples: total muscle lysates  
Image captured by using ChemiDoc™ Touch Image System (Bio-Rad)  
Figure generated from this original image: Fig 7a/b (AMPK) - replicate 3

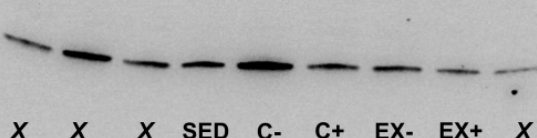

Identity of the experimental samples: total muscle lysates  
Image captured by using ChemiDoc™ Touch Image System (Bio-Rad)  
Figure generated from this original image: Fig 7a/b (p-AMPK) - replicate 1

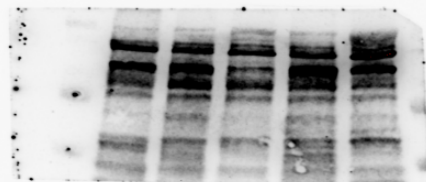

SED C- C+ EX- EX+

Identity of the experimental samples: total muscle lysates  
Image captured by using ChemiDoc™ Touch Image System (Bio-Rad)  
Figure generated from this original image: Fig 7a/b (p-AMPK) - replicate 2

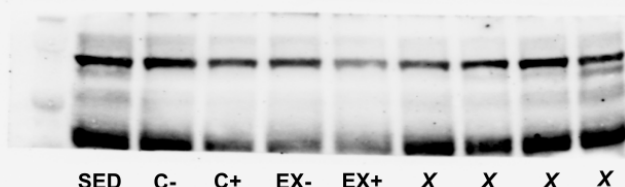

SED C- C+ EX- EX+ X X X X

Identity of the experimental samples: total muscle lysates  
Image captured by using ChemiDoc™ Touch Image System (Bio-Rad)  
Figure generated from this original image: Fig 7a/b (p-AMPK) - replicate 3

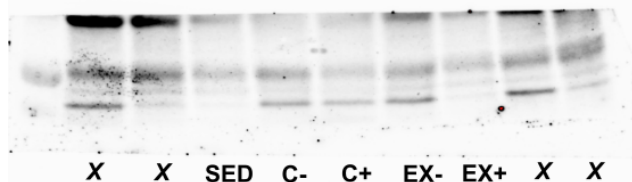

X X SED C- C+ EX- EX+ X X

Identity of the experimental samples: total muscle lysates  
Image captured by using ChemiDoc™ Touch Image System (Bio-Rad)  
Figure generated from this original image: Fig 8 (ACCB) - replicate 1

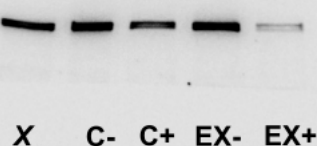

X C- C+ EX- EX+

Identity of the experimental samples: total muscle lysates  
Image captured by using ChemiDoc™ Touch Image System (Bio-Rad)  
Figure generated from this original image: Fig 8 (ACCB) - replicate 2

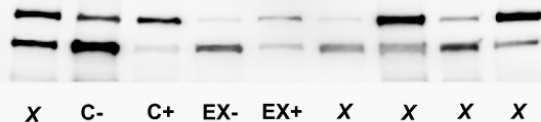

X C- C+ EX- EX+ X X X X

X C- C+ EX- EX+ X X X

Identity of the experimental samples: total muscle lysates  
Image captured by using ChemiDoc™ Touch Image System (Bio-Rad)  
Figure generated from this original image: Fig 8 (ACCB) - replicate 3

Identity of the experimental samples: total muscle lysates  
Image captured by using ChemiDoc™ Touch Image System (Bio-Rad)  
Figure generated from this original image: Fig 8 (p-ACC) - replicate 1

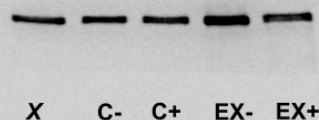

X C- C+ EX- EX+

Identity of the experimental samples: total muscle lysates  
Image captured by using ChemiDoc™ Touch Image System (Bio-Rad)  
Figure generated from this original image: Fig 8 (p-ACC) - replicate 2

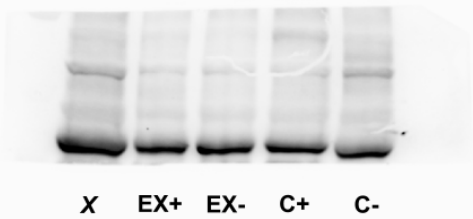

Identity of the experimental samples: total muscle lysates  
Image captured by using ChemiDoc™ Touch Image System (Bio-Rad)  
Figure generated from this original image: Fig 8 (p-ACC) - replicate 3

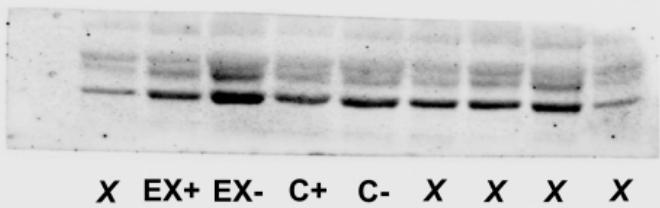

Identity of the experimental samples: muscle mitochondrial fraction.  
Image captured by using ChemiDoc™ Touch Image System (Bio-Rad)  
Figure generated from this original image: Fig 9a - replicate 1

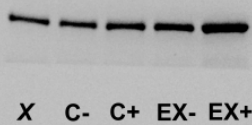

Identity of the experimental samples: muscle mitochondrial fraction.  
Image captured by using ChemiDoc™ Touch Image System (Bio-Rad)  
Figure generated from this original image: Fig 9a - replicate 2

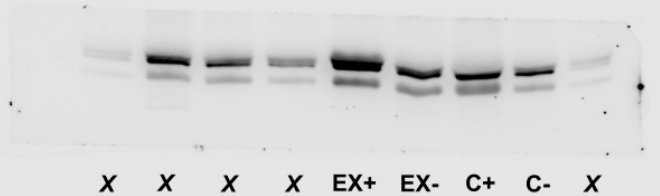

Identity of the experimental samples: muscle mitochondrial fraction.  
Image captured by using ChemiDoc™ Touch Image System (Bio-Rad)  
Figure generated from this original image: Fig 9a - replicate 3

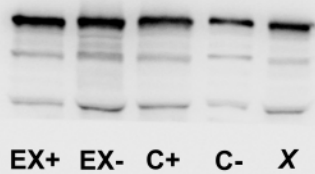

Identity of the experimental samples: muscle mitochondrial fraction.  
Image captured by using ChemiDoc™ Touch Image System (Bio-Rad)  
Figure generated from this original image: Fig 9b - replicate 1

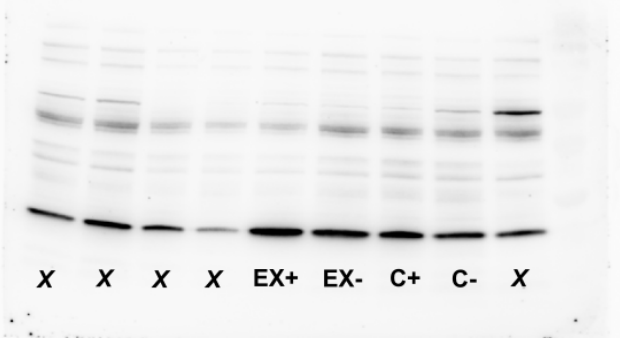

Identity of the experimental samples: muscle mitochondrial fraction.  
Image captured by using ChemiDoc™ Touch Image System (Bio-Rad)  
Figure generated from this original image: Fig 9b - replicate 2

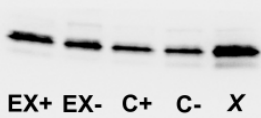

Identity of the experimental samples: muscle mitochondrial fraction.  
Image captured by using ChemiDoc™ Touch Image System (Bio-Rad)  
Figure generated from this original image: Fig 9b - replicate 3

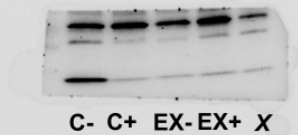

Identity of the experimental samples: total muscle lysates  
Image captured by using ChemiDoc™ Touch Image System (Bio-Rad)  
Figure generated from this original image: Fig 10a (p-AKT) - replicate 1

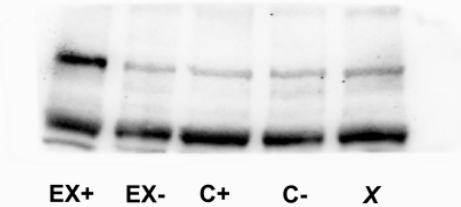

Identity of the experimental samples: total muscle lysates  
Image captured by using ChemiDoc™ Touch Image System (Bio-Rad)  
Figure generated from this original image: Fig 10a (p-AKT) - replicate 2

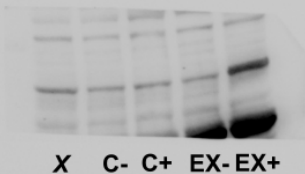

Identity of the experimental samples: total muscle lysates  
Image captured by using ChemiDoc™ Touch Image System (Bio-Rad)  
Figure generated from this original image: Fig 10a (p-AKT) - replicate 3

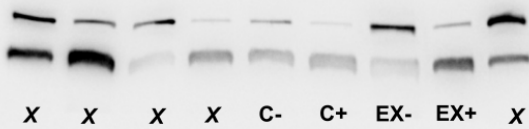

Identity of the experimental samples: total muscle lysates  
Image captured by using ChemiDoc™ Touch Image System (Bio-Rad)  
Figure generated from this original image: Fig 10a (AKT) - replicate 1

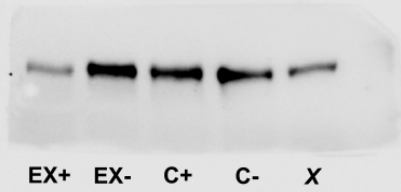

Identity of the experimental samples: total muscle lysates  
Image captured by using ChemiDoc™ Touch Image System (Bio-Rad)  
Figure generated from this original image: Fig 10a (AKT) - replicate 2

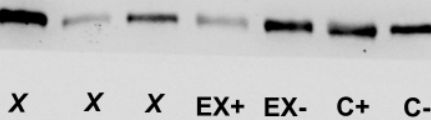

Identity of the experimental samples: total muscle lysates  
Image captured by using ChemiDoc™ Touch Image System (Bio-Rad)  
Figure generated from this original image: Fig 10a (AKT) - replicate 3

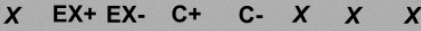

Identity of the experimental samples: total muscle lysates  
Image captured by using ChemiDoc™ Touch Image System (Bio-Rad)  
Figure generated from this original image: Fig 10b (p-GSK3β) - replicate 1

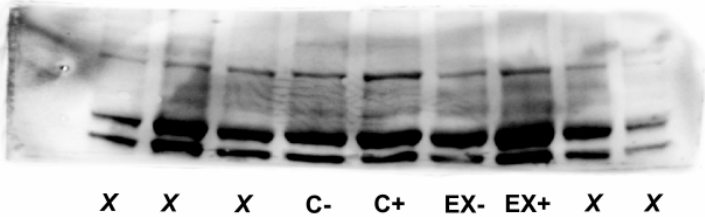

Identity of the experimental samples: total muscle lysates  
Image captured by using ChemiDoc™ Touch Image System (Bio-Rad)  
Figure generated from this original image: Fig 10b (p-GSK3β) - replicate 2

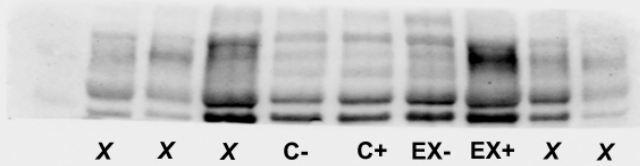

Identity of the experimental samples: total muscle lysates  
Image captured by using ChemiDoc™ Touch Image System (Bio-Rad)  
Figure generated from this original image: Fig 10b (p-GSK3β) - replicate 3

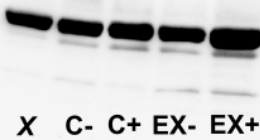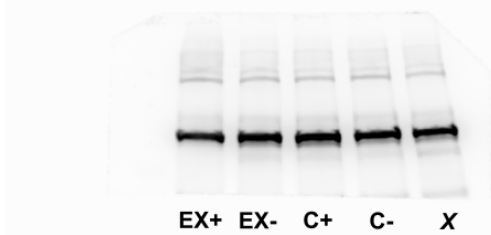

Identity of the experimental samples: total muscle lysates  
Image captured by using ChemiDoc™ Touch Image System (Bio-Rad)  
Figure generated from this original image: Fig 10b (GSK3β) - replicate 1

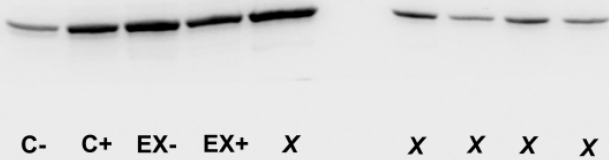

Identity of the experimental samples: total muscle lysates  
Image captured by using ChemiDoc™ Touch Image System (Bio-Rad)  
Figure generated from this original image: Fig 10b (GSK3β) - replicate 2

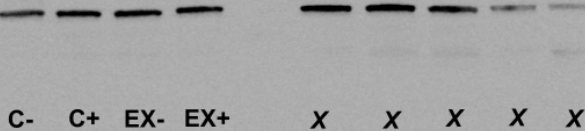

Identity of the experimental samples: total muscle lysates  
Image captured by using ChemiDoc™ Touch Image System (Bio-Rad)  
Figure generated from this original image: Fig 10b (GSK3β) - replicate 3



Identity of the experimental samples: total muscle lysates  
Image captured by using ChemiDoc™ Touch Image System (Bio-Rad)  
Figure generated from this original image: Fig 11a (p-mTOR) - replicate 1

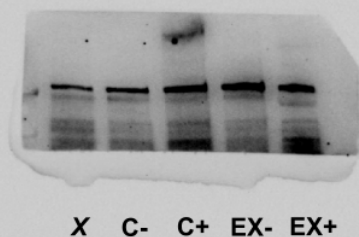

Identity of the experimental samples: total muscle lysates  
Image captured by using ChemiDoc™ Touch Image System (Bio-Rad)  
Figure generated from this original image: Fig 11a (p-mTOR) - replicate 2

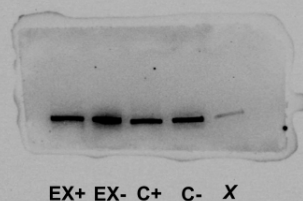

Identity of the experimental samples: total muscle lysates  
Image captured by using ChemiDoc™ Touch Image System (Bio-Rad)  
Figure generated from this original image: Fig 11a (p-mTOR) - replicate 3

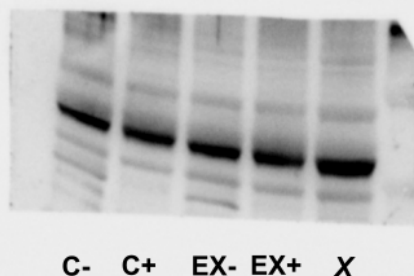

Identity of the experimental samples: total muscle lysates  
Image captured by using ChemiDoc™ Touch Image System (Bio-Rad)  
Figure generated from this original image: Fig 11a (mTOR) - replicate 1

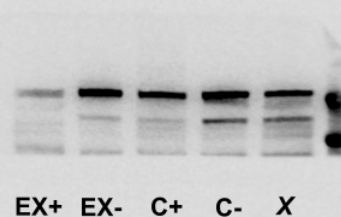

Identity of the experimental samples: total muscle lysates  
Image captured by using ChemiDoc™ Touch Image System (Bio-Rad)  
Figure generated from this original image: Fig 11a (mTOR) - replicate 2

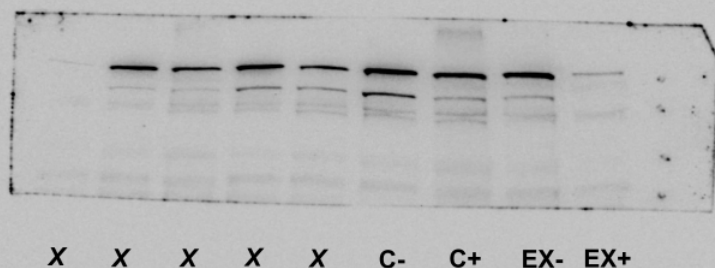

Identity of the experimental samples: total muscle lysates  
Image captured by using ChemiDoc™ Touch Image System (Bio-Rad)  
Figure generated from this original image: Fig 11a (mTOR) - replicate 3

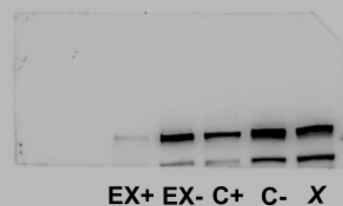

Identity of the experimental samples: total muscle lysates  
Image captured by using ChemiDoc™ Touch Image System (Bio-Rad)  
Figure generated from this original image: Fig 11b (p-p70S6K) - replicate 1

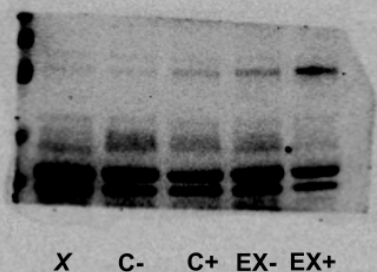

Identity of the experimental samples: total muscle lysates  
Image captured by using ChemiDoc™ Touch Image System (Bio-Rad)  
Figure generated from this original image: Fig 11b (p70S6K) - replicate 1

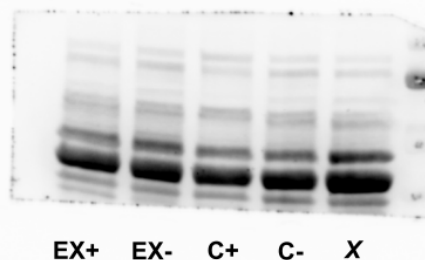



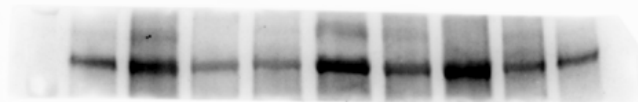

X X X C- C+ EX- EX+ X X

Identity of the experimental samples: total muscle lysates  
Image captured by using ChemiDoc™ Touch Image System (Bio-Rad)  
Figure generated from this original image: Fig 12 - replicate 1

Identity of the experimental samples: total muscle lysates  
Image captured by using ChemiDoc™ Touch Image System (Bio-Rad)  
Figure generated from this original image: Fig 12 - replicate 2

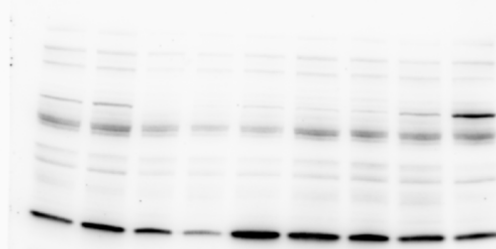

X X X X EX+ EX- C+ C- X

Identity of the experimental samples: total muscle lysates  
Image captured by using ChemiDoc™ Touch Image System (Bio-Rad)  
Figure generated from this original image: Fig 12 - replicate 3

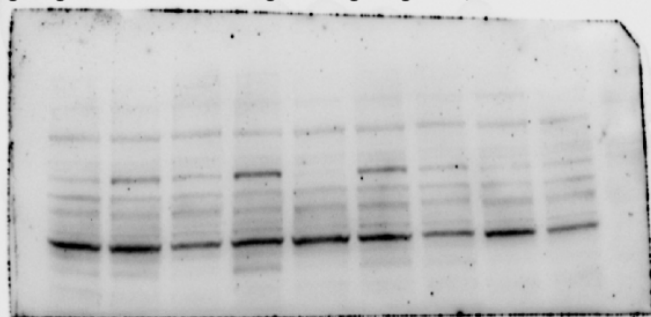

X X X X X EX+ EX- C+ C-

Identity of the experimental samples: total muscle lysates  
Image captured by using ChemiDoc™ Touch Image System (Bio-Rad)  
Figure generated from this original image: Fig 13a/b - replicate 1

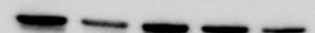

EX+ EX- C+ C- SED

Identity of the experimental samples: total muscle lysates  
Image captured by using ChemiDoc™ Touch Image System (Bio-Rad)  
Figure generated from this original image: Fig 13a - replicate 2

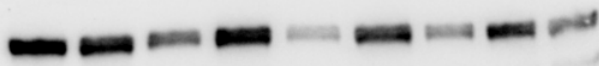

SED C- X X X X X X X

Identity of the experimental samples: total muscle lysates  
Image captured by using ChemiDoc™ Touch Image System (Bio-Rad)  
Figure generated from this original image: Fig 13a - replicate 2

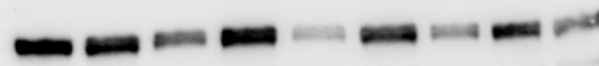

SED C- X X X X X X X

Identity of the experimental samples: total muscle lysates  
Image captured by using ChemiDoc™ Touch Image System (Bio-Rad)  
Figure generated from this original image: Fig 13a - replicate 3

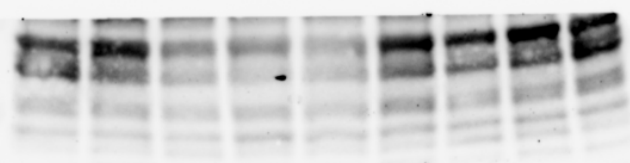

X X X X X X SED C- X

Identity of the experimental samples: total muscle lysates  
Image captured by using ChemiDoc™ Touch Image System (Bio-Rad)  
Figure generated from this original image: Fig 13b - replicate 2

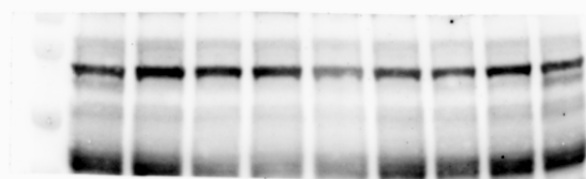

C- C+ EX- EX+ X X X X X

Identity of the experimental samples: total muscle lysates  
Image captured by using ChemiDoc™ Touch Image System (Bio-Rad)  
Figure generated from this original image: Fig 13b - replicate 3

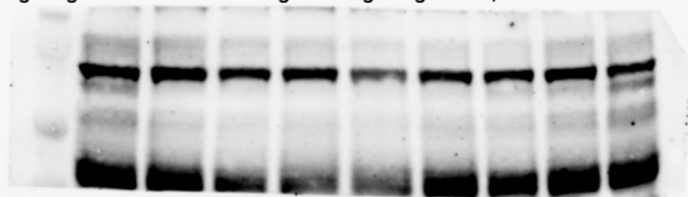

X X C- C+ EX- EX+ X X X

Identity of the experimental samples: total muscle lysates  
Image captured by using ChemiDoc™ Touch Image System (Bio-Rad)  
Figure generated from this original image: Fig 14a/b - replicate 1

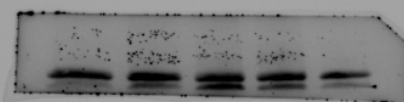

EX+ EX- C+ C- SED

Identity of the experimental samples: total muscle lysates  
Image captured by using ChemiDoc™ Touch Image System (Bio-Rad)  
Figure generated from this original image: Fig 14a - replicate 2

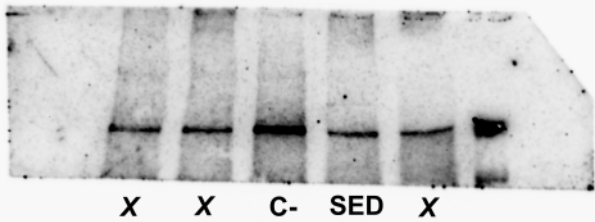

Identity of the experimental samples: total muscle lysates  
Image captured by using ChemiDoc™ Touch Image System (Bio-Rad)  
Figure generated from this original image: Fig 14a - replicate 3

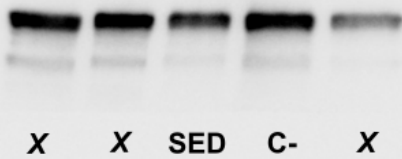

Identity of the experimental samples: total muscle lysates  
Image captured by using ChemiDoc™ Touch Image System (Bio-Rad)  
Figure generated from this original image: Fig 14b - replicate 2

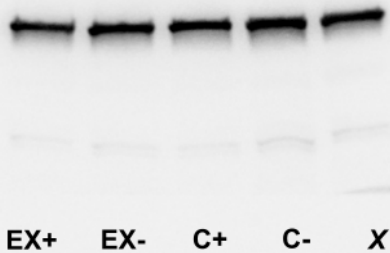

Identity of the experimental samples: total muscle lysates  
Image captured by using ChemiDoc™ Touch Image System (Bio-Rad)  
Figure generated from this original image: Fig 14b - replicate 3

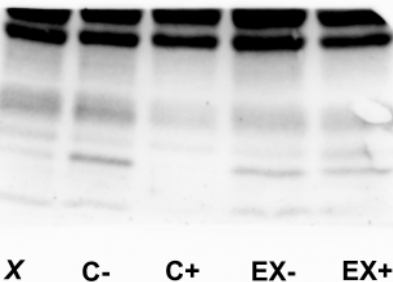

Identity of the experimental samples: total muscle lysates  
Image captured by using ChemiDoc™ Touch Image System (Bio-Rad)  
Figure generated from this original image: Fig 15a/b - replicate 1

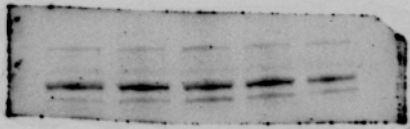

Identity of the experimental samples: total muscle lysates  
Image captured by using ChemiDoc™ Touch Image System (Bio-Rad)  
Figure generated from this original image: Fig 15a - replicate 2

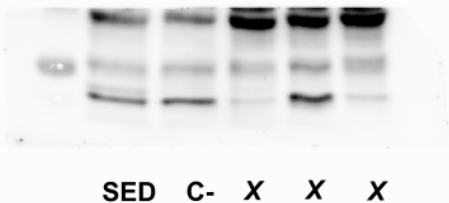

Identity of the experimental samples: total muscle lysates  
Image captured by using ChemiDoc™ Touch Image System (Bio-Rad)  
Figure generated from this original image: Fig 15a - replicate 3

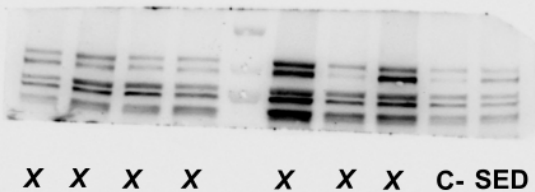

Identity of the experimental samples: total muscle lysates  
Image captured by using ChemiDoc™ Touch Image System (Bio-Rad)  
Figure generated from this original image: Fig 15b - replicate 2

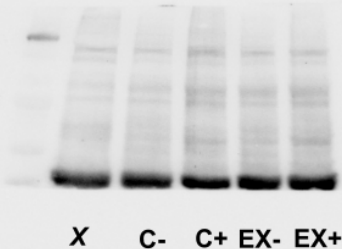

Identity of the experimental samples: total muscle lysates  
Image captured by using ChemiDoc™ Touch Image System (Bio-Rad)  
Figure generated from this original image: Fig 15b - replicate 3

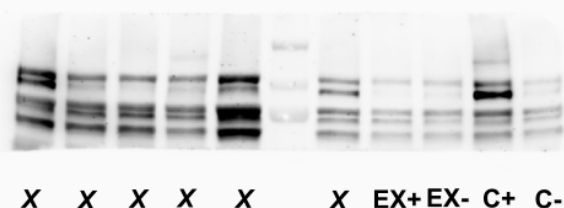

Identity of the experimental samples: total muscle lysates  
Image captured by using ChemiDoc™ Touch Image System (Bio-Rad)  
Figure generated from this original image: Fig 9a/b (GAPDH) - replicate 1

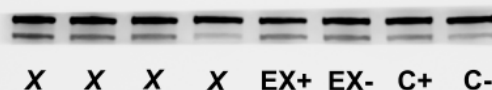

Identity of the experimental samples: total muscle lysates  
Image captured by using ChemiDoc™ Touch Image System (Bio-Rad)  
Figure generated from this original image: Fig 9a/b (GAPDH) - replicate 2

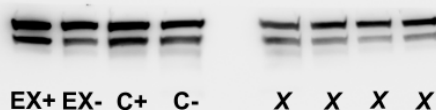

Identity of the experimental samples: total muscle lysates  
Image captured by using ChemiDoc™ Touch Image System (Bio-Rad)  
Figure generated from this original image: Fig 9a/b (GAPDH) - replicate 3

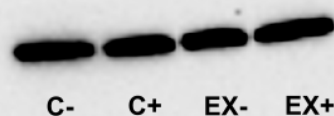

Identity of the experimental samples: total muscle lysates  
Image captured by using ChemiDoc™ Touch Image System (Bio-Rad)  
Figure generated from this original image: Fig 12,13,14,15 a/b - replicate 1

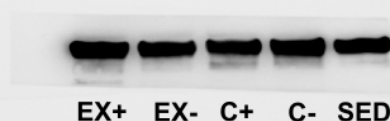

Identity of the experimental samples: total muscle lysates  
Image captured by using ChemiDoc™ Touch Image System (Bio-Rad)  
Figure generated from this original image: Fig 12,13,14,15 a/b - replicate 2

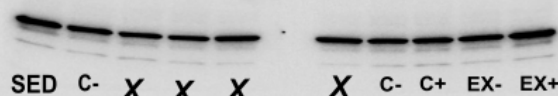

Identity of the experimental samples: total muscle lysates  
Image captured by using ChemiDoc™ Touch Image System (Bio-Rad)  
Figure generated from this original image: Fig 12,13,14,15 a/b - replicate 3

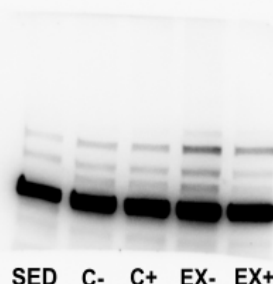

Supplement: s1 [file s1]
