# Supplementary material for: Metformin Protects Rat Skeletal Muscle from Physical Exercise-Induced Injury
Source: MDPI journal article supplement (doi:10.3390/biomedicines11092334), 2023-08-22
Supplement: s1 [file s1]

Table S1: List of primary antibodies employed for Western Blot (WB) and Immunohistochemical Analysis (IHC).

| Primary Antibody                                                                       | Source | Dilution /Application       | Supplier             |
|----------------------------------------------------------------------------------------|--------|-----------------------------|----------------------|
| Acetyl-CoA Carboxylase beta (ACC $\beta$ )                                             | rabbit | 1:1000 / WB                 | Cell Signaling 3662  |
| Phospho-Acetyl CoA Carboxylase (p-ACC) (Ser79)                                         | rabbit | 1:1000 / WB                 | Cell Signaling 3661  |
| Protein Kinase B (AKT)                                                                 | mouse  | 1:2000 / WB                 | Cell Signaling 2920  |
| Phospho-Protein Kinase B (p-AKT) (Ser473)                                              | rabbit | 1:1000 / WB                 | Cell Signaling 9271  |
| Activating Adenosine Monophosphate-activated Protein Kinase (AMPK)                     | rabbit | 1:1000 / WB                 | Cell Signaling 2532  |
| Phospho- Activating Adenosine Monophosphate-activated Protein Kinase (p-AMPK) (Thr172) | rabbit | 1:1000 / WB                 | Cell Signaling 2535  |
| Cytochrome C (Cyt C)                                                                   | mouse  | 1:1000 / WB                 | Invitrogen 45-6100   |
| Glyceraldehyde-3-Phosphate Dehydrogenase (GAPDH)                                       | mouse  | 1:25000 / WB                | Ambion AM4300        |
| Glycogen Synthase Kinase 3 beta (GSK3 $\beta$ )                                        | rabbit | 1:1000 / WB                 | Cell Signaling 9315  |
| Phospho-Glycogen Synthase Kinase 3 beta (p-GSK3 $\beta$ ) (Ser9)                       | rabbit | 1:1000 / WB                 | Cell Signaling 9323  |
| Mammalian Target of Rapamycin (mTOR)                                                   | mouse  | 1:1000 / WB                 | Cell Signaling 4517  |
| Phospho-Mammalian Target of Rapamycin (p-mTOR) (Ser2448)                               | rabbit | 1:1000 / WB                 | Cell Signaling 2971  |
| Myogenic Factor 5 (Myf5)                                                               | rabbit | 1:10000 / WB<br>1:500 / IHC | Abcam ab125078       |
| Myosin Heavy Chain 1/2 (MYH1/2)                                                        | mouse  | 1:500 / WB                  | Santa Cruz sc-53088  |
| Myosin Heavy Chain 1/2/3 (MYH1/2/3)                                                    | mouse  | 1:50 / IHC                  | Santa Cruz sc-53092  |
| Myoblast Differentiation Protein (MyoD)                                                | mouse  | 1:500 / WB<br>1:100 /IHC    | BD Pharmingen 554130 |
| Myogenin                                                                               | mouse  | 1:50 / IHC                  | Abcam ab1835         |
| Paired Box 7 (PAX7)                                                                    | rabbit | 1:1000 / WB<br>1:200 / IHC  | Abcam ab34360        |

| Primary Antibody                                                                          | Source | Dilution /Application | Supplier            |
|-------------------------------------------------------------------------------------------|--------|-----------------------|---------------------|
| Peroxisome Proliferator-Activated Receptor<br>gamma Coactivator-1 alpha (PGC-1 $\alpha$ ) | rabbit | 1:1000 /WB            | Abcam ab54481       |
| Ribosomal Protein S6 Kinase (p70S6K)                                                      | mouse  | 1:1000 /WB            | Santa Cruz sc-8418  |
| Phospho-Ribosomal Protein S6 Kinase (p-<br>p70S6K) (Thr389)                               | mouse  | 1:1000 / WB           | Cell Signaling 9206 |
| vinculin                                                                                  | mouse  | 1:1000 /WB            | Santa Cruz sc-25336 |
