# Supplementary material for: Metformin Protects Rat Skeletal Muscle from Physical Exercise-Induced Injury
Source: MDPI journal article supplement (doi:10.3390/biomedicines11092334), 2023-08-22
Supplement: s1 [file s1]

## Myogenin

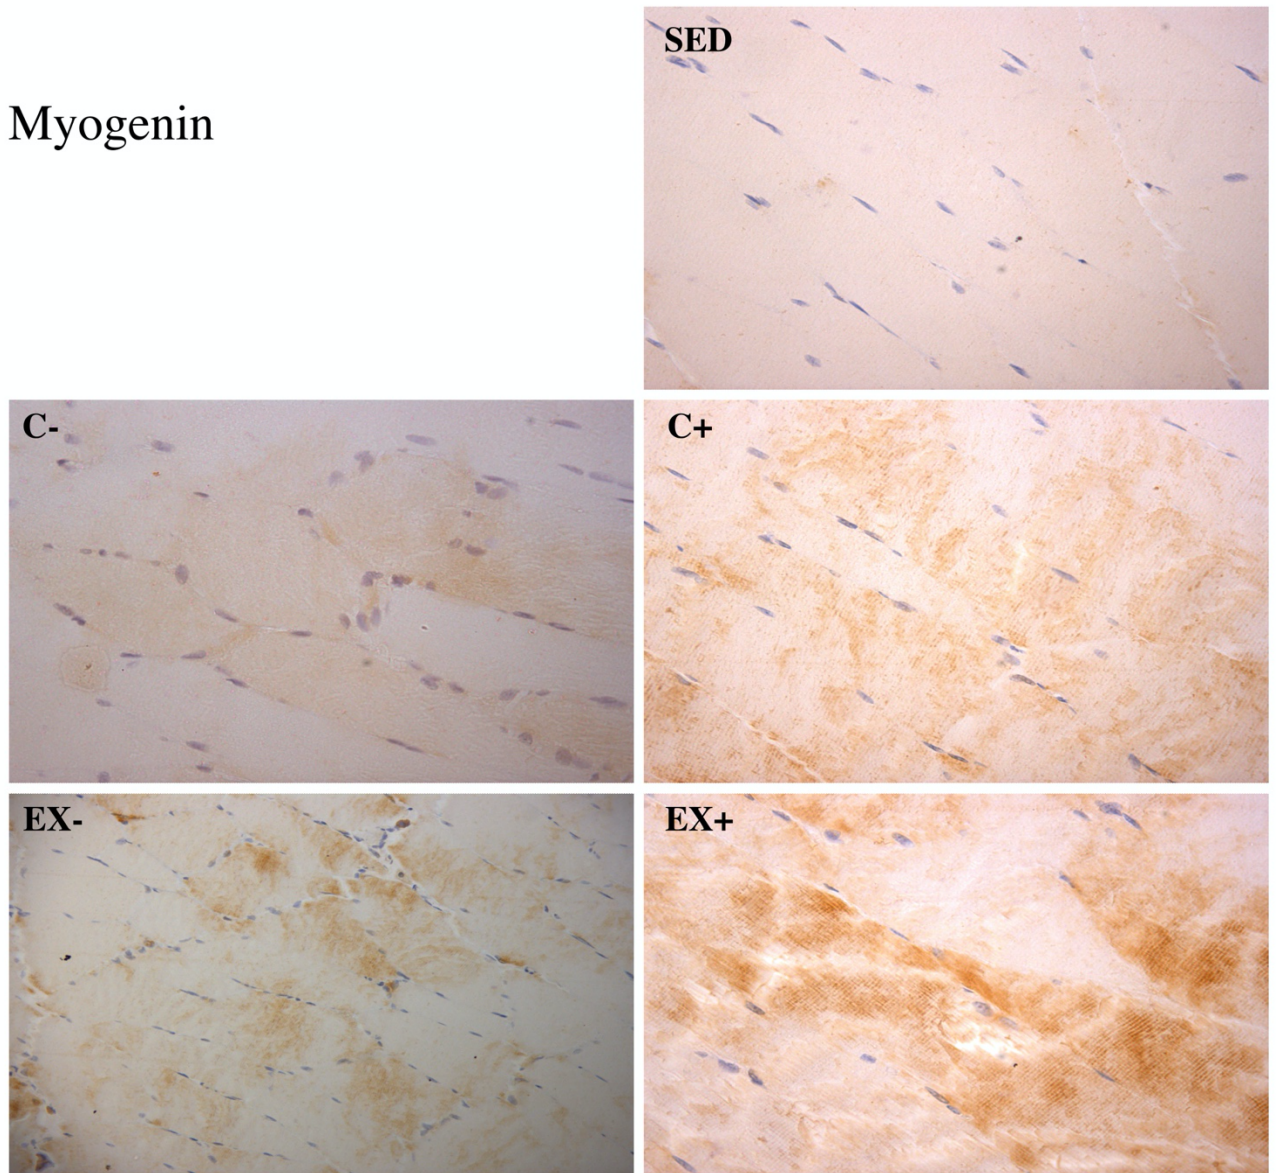

**Figure S4.** Representative immunohistochemical staining of Myogenin from muscle tissue of experimental groups. Magnification 20X.
